# Supplementary material for: Ex Vivo Expanded Human NK Cells Survive and Proliferate in Humanized Mice with Autologous Human Immune Cells
Source: PubMed Central journal article supplement (PMC5608690; doi:10.1038/s41598-017-12223-8), 2017-09-21
Supplement: 41598_2017_12223_MOESM1_ESM.pdf [file 41598_2017_12223_MOESM1_ESM.pdf]

***Ex Vivo* Expanded Human NK Cells Survive and Proliferate in Humanized Mice with  
Autologous Human Immune Cells**

Fatemeh Vahedi<sup>1</sup>, Tina Nham<sup>1</sup>, Sophie Poznanski<sup>1</sup>, Marianne V. Chew<sup>1</sup>, Mira M. Shenouda<sup>1</sup>,  
Dean Lee<sup>2</sup>, Ashkar A. Ali<sup>1\*</sup>

<sup>1</sup>Department of Pathology and Molecular Medicine, McMaster Immunology Research Centre, McMaster University, Hamilton, Ontario, Canada. <sup>2</sup>Cellular Therapy and Cancer Immunology Program, Department of Hematology/Oncology and BMT, Nationwide Children's Hospital, The Ohio State University Comprehensive Cancer Center

Short title: Expanded NK cell survival in autologous humanized mice

\*Corresponding author: Ali A. Ashkar, 1280 Main Street West, MDCL 4015, Email Address:

[ashkara@mcmaster.ca](mailto:ashkara@mcmaster.ca)

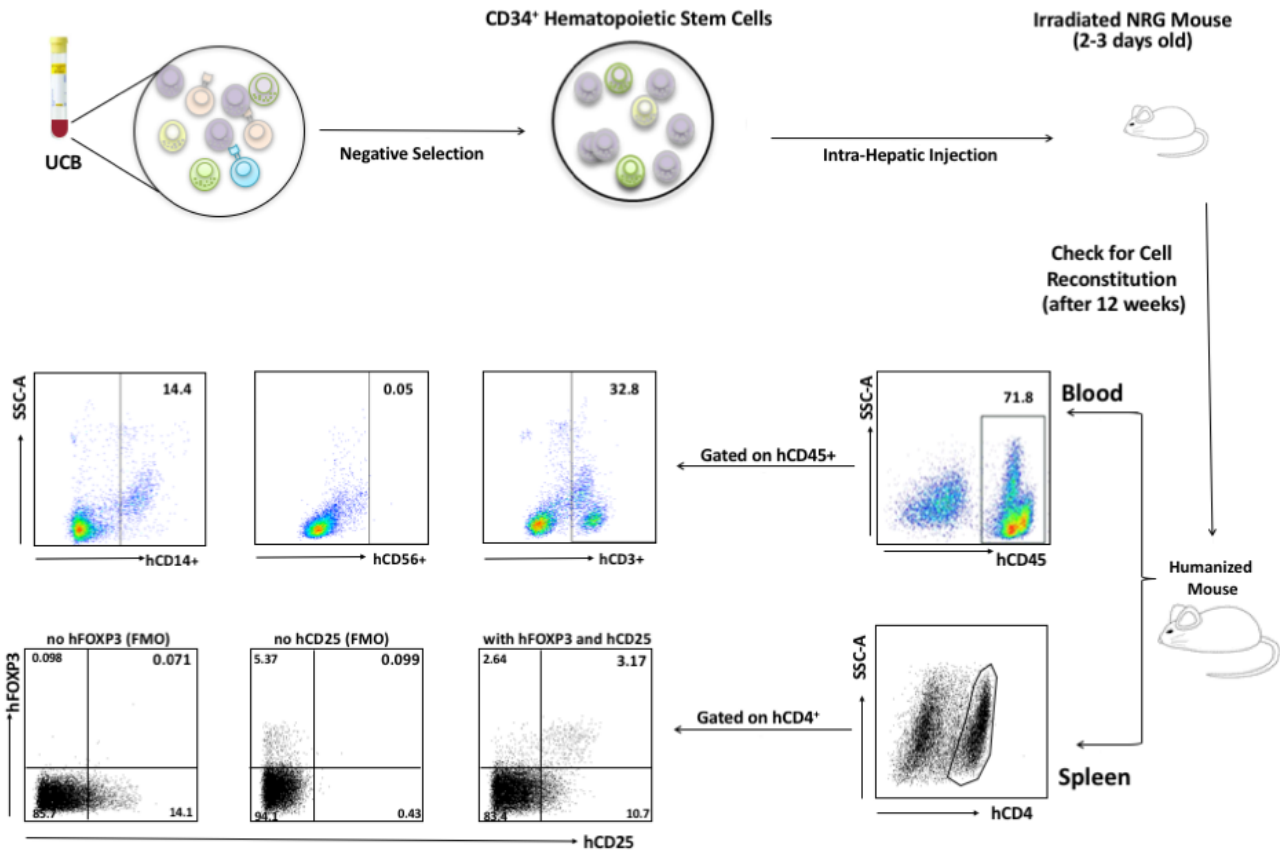

**Figure S1. Generation of humanized mice for adoptive transfer of autologous ex vivo expanded human NK cells.** Two fractions of an autologous cord blood (CB) unit were either enriched for CD34<sup>+</sup> hematopoietic stem cells or isolated for cord blood mononuclear cells (CBMCs). CD34<sup>+</sup> hematopoietic stem cells were injected into the liver of irradiated NRG mice at 2-3 days of age. After 12 weeks, facial bleeds were performed and PBMCs were analyzed for hCD45<sup>+</sup> cells through flow cytometry to check for the engraftment of human immune cells. Subpopulations of hCD3<sup>+</sup>, hCD56<sup>+</sup>, and CD14<sup>+</sup> were measured by gating first on the hCD45<sup>+</sup> population. The splenocytes of humanized mice (n=5) were isolated and stained for hCD4, hCD25, and hFOXP3 markers to check the Treg cell population. The percentage of CD4<sup>+</sup>CD25<sup>+</sup>FOXP3<sup>+</sup> population was found to be  $2.974 \pm 1.214$ , significantly (student's t-test,  $p < 0.01$ ) higher than control mice (NRG, non-humanized). Representative flow cytometry plots of the CD4<sup>+</sup>CD25<sup>+</sup>FOXP3<sup>+</sup> population are shown.

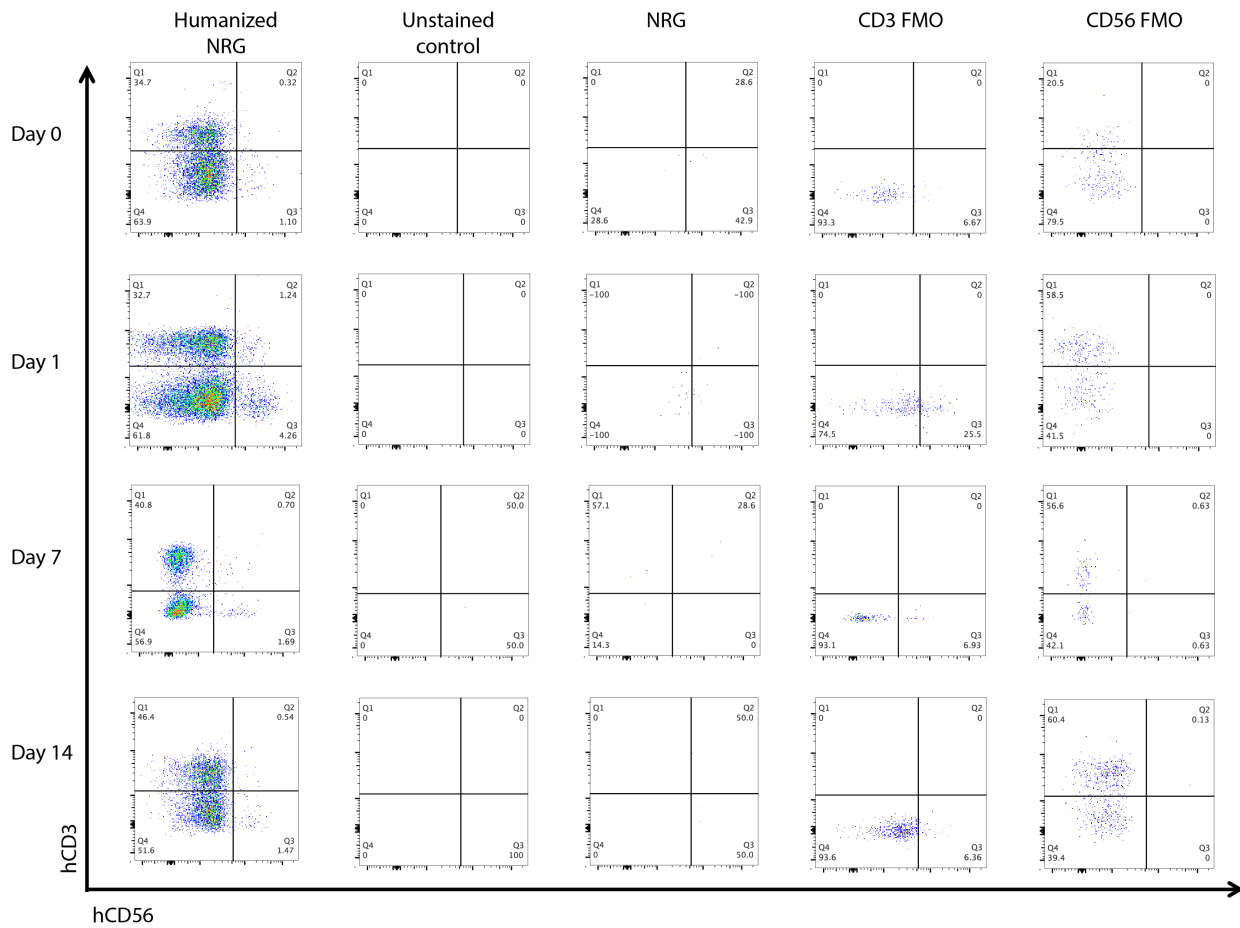

**Figure S2. NK cells do not persist following adoptive transfer to allogeneic humanized mice.** While an increased percentage of NK cells was detected at one day post injection, there was no evidence of NK cells proliferation by day 7 as observed in the autologous transfer and cells were not detectable beyond day 14.
